# Supplementary material for: Amazonian Podzols – a carbon time bomb?
Source: Copernicus journal article supplement (doi:10.5194/egusphere-2025-3356), 2025-08-12
Supplement: Supplementary file 1 [file egusphere-2025-3356-supplement.pdf]

## Amazonian Podzols - a carbon time bomb? - Supplementary data

Naoise Nunan<sup>a</sup>, Claire Chenu<sup>b</sup>, Valérie Pouteau<sup>b</sup>, André Soro<sup>a,e</sup>, Kevin Potard<sup>a</sup>, Célia Regina

Montes<sup>c</sup>, Patricia Merdy<sup>d</sup>, Adolpho José Melfi<sup>c</sup>, Yves Lucas<sup>d</sup>

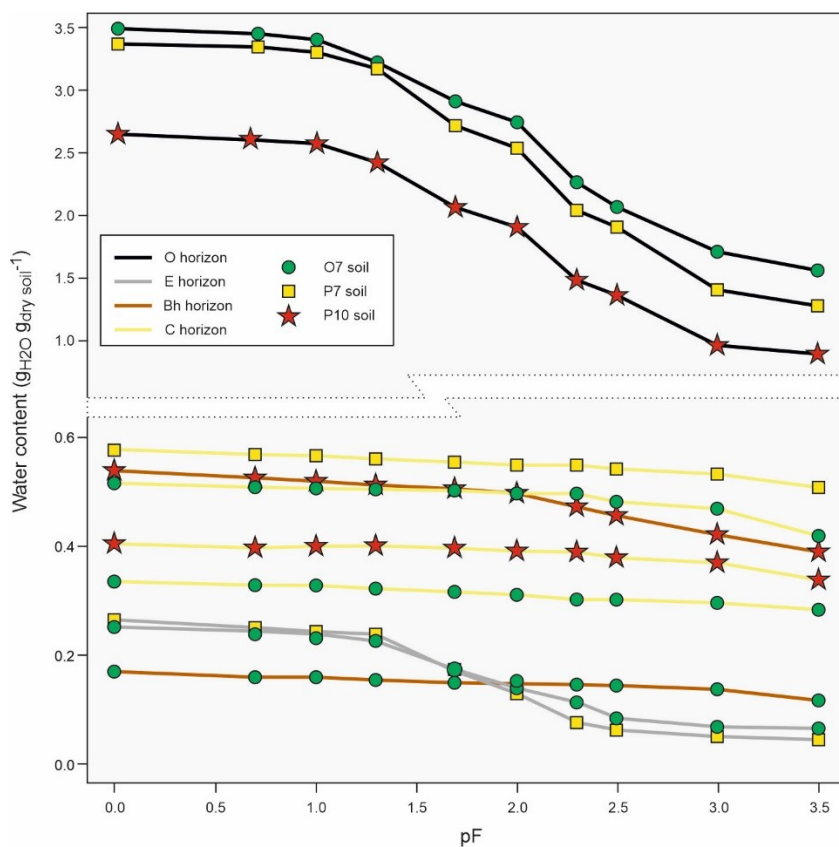

Fig S1. Moisture retention curves of the different horizons of the Amazonian Podzols.

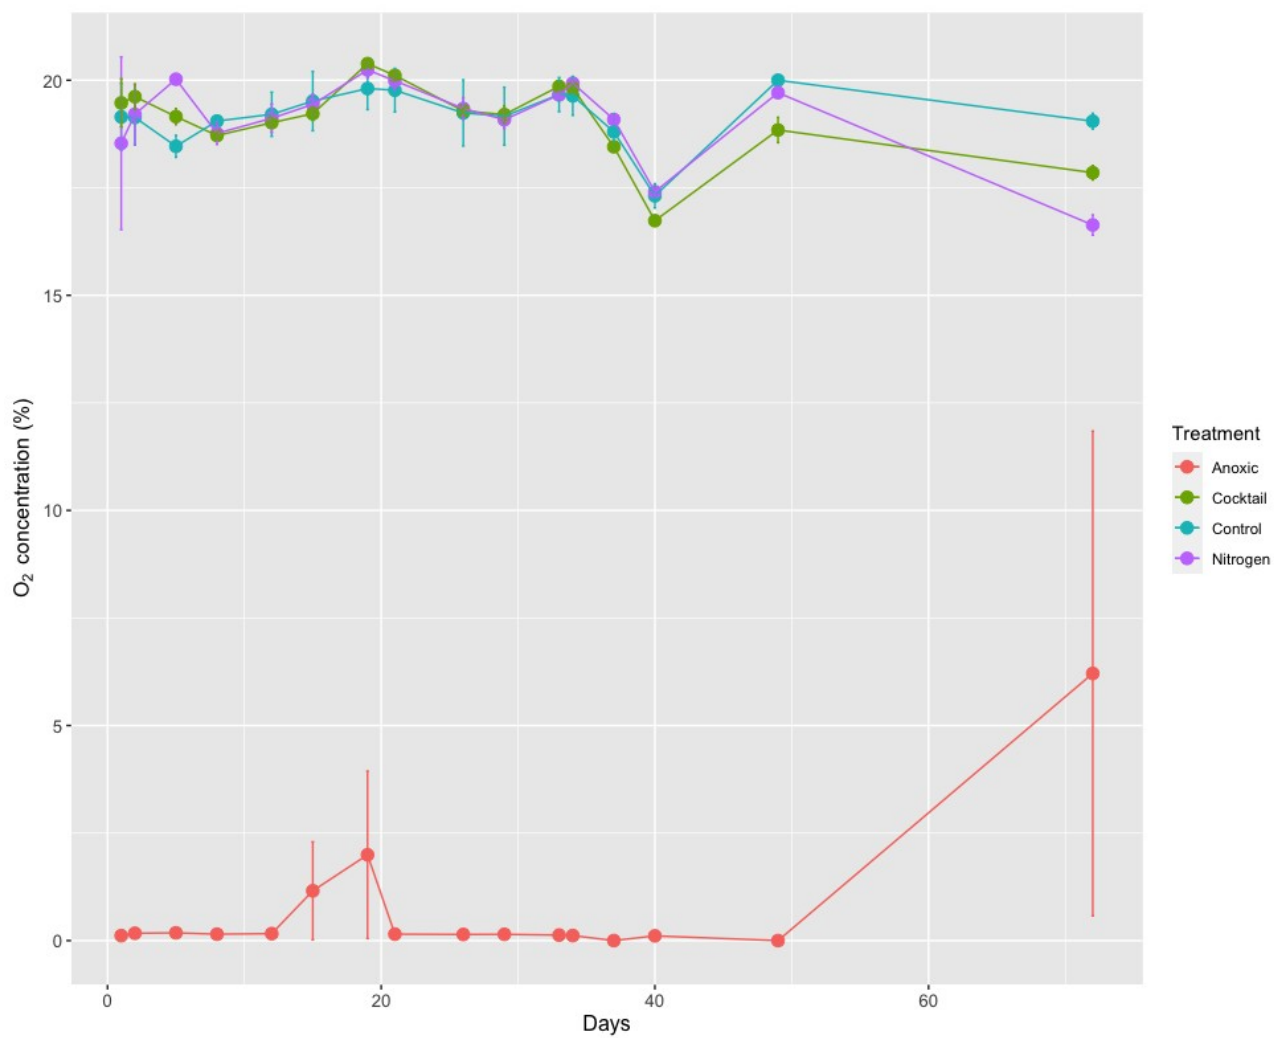

Figure S2. Oxygen concentrations in the microcosm headspaces.

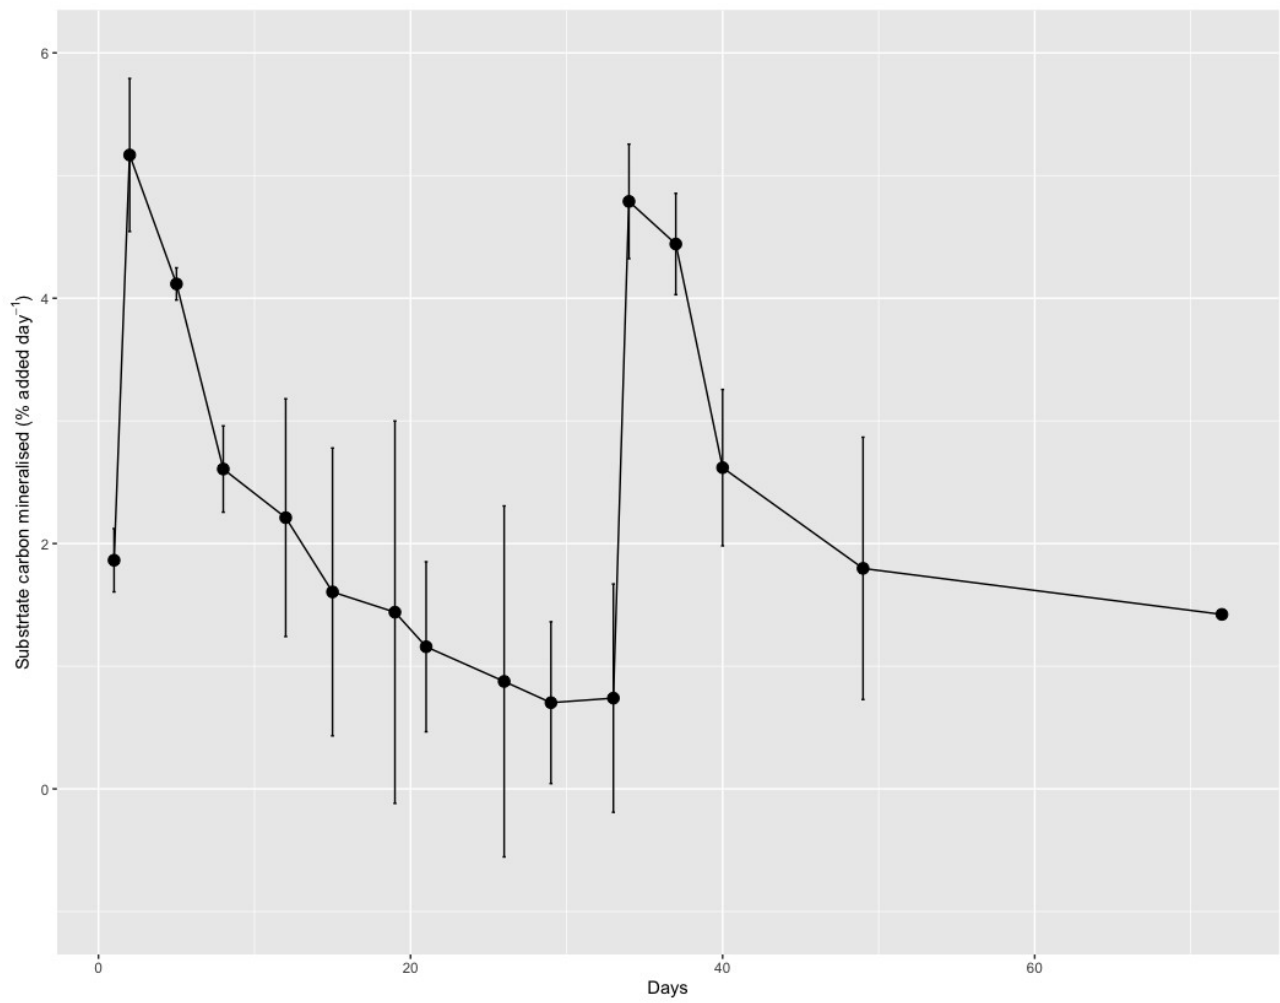

Figure S3. Mineralisation of organic C in substrate cocktail as a percentage of the C added. The two peaks occurred immediately after the addition of the cocktail, on the first and 34<sup>th</sup> days of the incubation. The bars indicate the standard error of the mean.

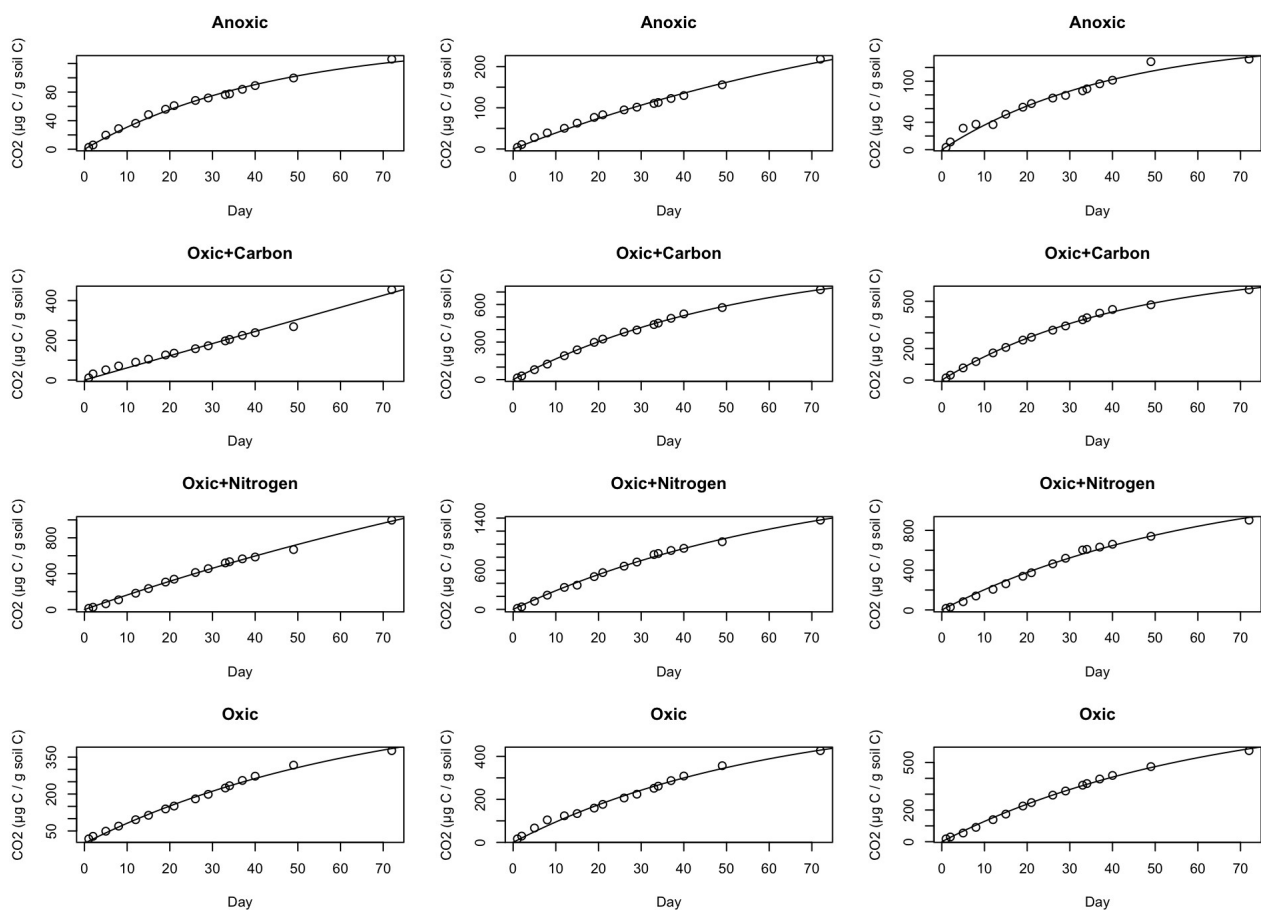

Fig S4 Soil organic C mineralisation in Podzol Bh horizons after imposition of treatments and fitted first-order decay models. Note the differences in scale along the y-axes.

Table S1 First order decay model parameters  $a$  (size of C pool mineralised) and  $\alpha$  (decomposition rate). Different letters within the same column indicate significant differences ( $P < 0.01$ )

| Treatment       | $a$               | Standard error | $\alpha$           | Standard error |
|-----------------|-------------------|----------------|--------------------|----------------|
| Anoxic          | 244 <sup>a</sup>  | 88             | 0.019 <sup>a</sup> | 0.005          |
| Oxic            | 677 <sup>ab</sup> | 83             | 0.016 <sup>a</sup> | 0.001          |
| Oxic + nitrogen | 2119 <sup>b</sup> | 458            | 0.012 <sup>a</sup> | 0.003          |
| Oxic + carbon   | 843 <sup>ab</sup> | 132            | 0.021 <sup>a</sup> | 0.002          |
